# Supplementary material
Source: MDPI journal article supplement (https://www.mdpi.com/2077-0472/14/4/633)
Supplement: s1 [file s1]

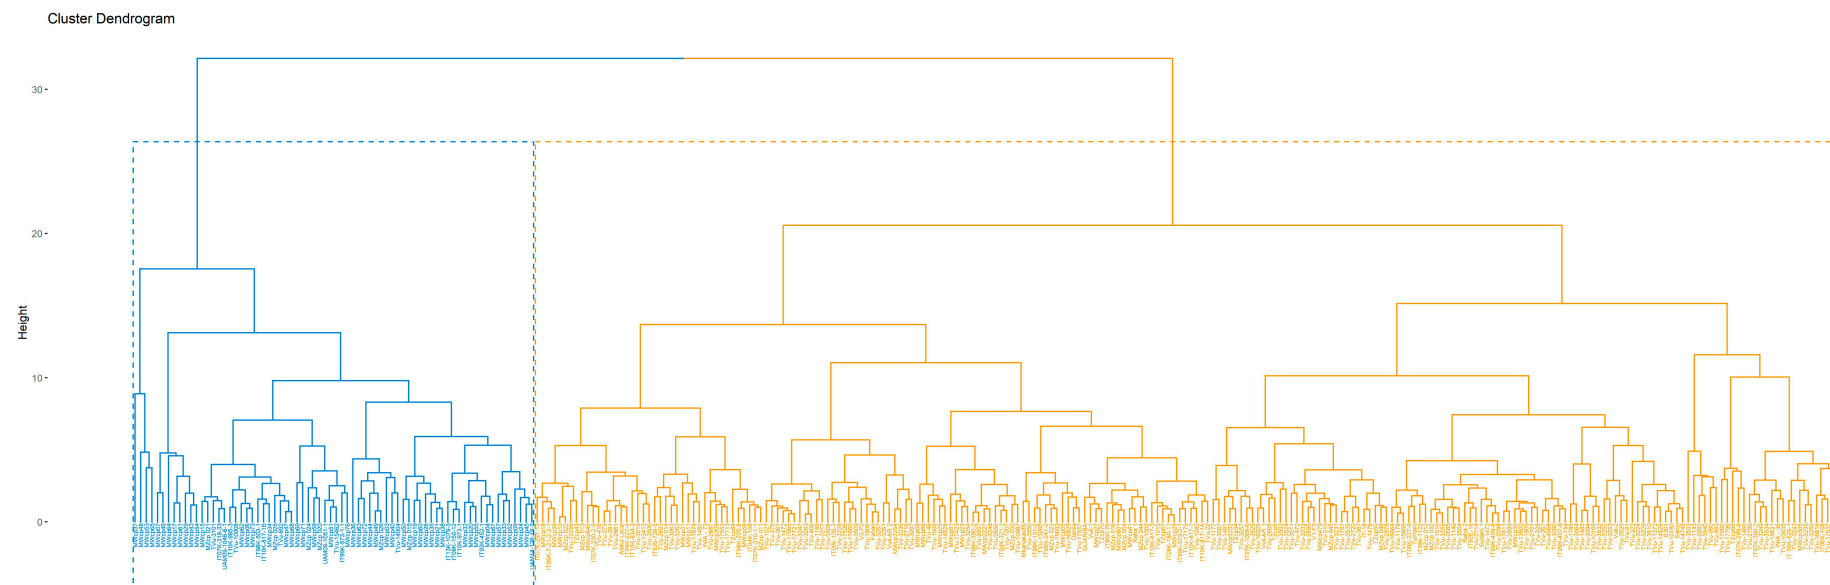

**Supplementary Figure S1.** Hierarchical clustering dendrogram analysis. Euclidean distance was used, and the associations between groups were conducted by the Ward method for the quality traits (Cluster I = Gold color and Cluster II = Blue color).
