# Supplementary material
Source: MDPI journal article supplement (https://www.mdpi.com/2077-0472/14/4/633)
Supplement: s1 [file s1 › Supplementary Table S1.xlsx]

## Sheet: Sheet1
Suplementeray Table S1. Genotype mean values for grain quality, cooking quality and nutritional quality traits
						Mean values with SD
Genotype	Origin	Protein content (%)	Iron content (mg/Kg)	Zinc content (mg/Kg)	Broth viscosity (cP)	Cooking time (Minutes)	Seed length (mm)	Seed width (mm)	Seed weight (g/100 seeds)	Seed coat colur	Seed shape
Aloka Local	Nigeria	11.77 ± 0.05	2.56 ± 0	0.35 ± 0	3.1 ± 0.28	59.5 ± 3.54	7.27 ± 1.62	4.53 ± 0.74	14.27 ± 2.54	White	Rhomboid
B301	IITA	7.65 ± 0.05	1.19 ± 0	0.37 ± 0	3.6 ± 1.41	62.5 ± 3.54	5.93 ± 1.03	4.07 ± 0.7	9.47 ± 3.27	Brown	Ovoid
Danila	Nigeria	7.51 ± 0.25	1.03 ± 0	0.37 ± 0	4.1 ± 0.14	80.5 ± 3.54	8 ± 1.07	5.6 ± 0.74	14.1 ± 1.06	White	Rhomboid
Fahari	Tanzania	5.38 ± 0.45	2.13 ± 0	0.37 ± 0	4.2 ± 0.14	61.5 ± 3.54	6.93 ± 1.39	4.53 ± 0.74	9.4 ± 0.7	Brown	Ovoid
GUARIBA	Mozambique	6.23 ± 0.07	2.87 ± 0	0.18 ± 0	4.4 ± 0.28	102.5 ± 3.54	6.6 ± 1.12	4.8 ± 0.68	14.47 ± 1.08	White	Kidney
INIA - 36	Mozambique	15.75 ± 0.25	6.21 ± 0.15	0.38 ± 0	3.9 ± 0.14	58.5 ± 3.54	7.87 ± 1.25	5.2 ± 0.56	16.17 ± 3.75	Brown	Ovoid
INIA - 73	Mozambique	8.11 ± 0.3	4.46 ± 0	0.46 ± 0	3.2 ± 0.28	99.5 ± 3.54	5.47 ± 0.74	4 ± 0.65	13.5 ± 6.38	Brown	Ovoid
IT 99K-529-1	Malawi	20.29 ± 0.15	7.15 ± 0	0.45 ± 0	3.2 ± 0.28	68 ± 4.24	7 ± 0.93	4.6 ± 0.63	12.77 ± 2.89	Brown	Ovoid
IT00k-126-3	IITA	6.05 ± 0.03	3.23 ± 0	0.13 ± 0	4.6 ± 0.28	58.5 ± 2.12	5.93 ± 0.8	4.27 ± 0.7	9.97 ± 1.42	Brown	Ovoid
IT04K-108	IITA	11.24 ± 0.3	1.25 ± 0	0.31 ± 0	3.65 ± 0.21	90 ± 2.83	6.53 ± 1.13	4.33 ± 0.62	13.33 ± 5.14	Brown	Ovoid
IT04K-227-4	IITA	10.21 ± 10.69	3.63 ± 2.83	0.34 ± 0.03	2.65 ± 0.64	52 ± 2.83	7.07 ± 1.33	4.87 ± 0.74	14.37 ± 3.04	White	Rhomboid
IT04K-321-1	IITA	10.12 ± 10.71	3.63 ± 2.83	0.34 ± 0.03	4.2 ± 0.14	68 ± 2.83	7.27 ± 1.22	5 ± 0.85	11.23 ± 1.16	Brown	Ovoid
IT06K-108	IITA	18.05 ± 0.4	7.73 ± 0	0.4 ± 0	2.65 ± 0.64	106.5 ± 2.12	6.27 ± 1.1	4.6 ± 0.63	12.27 ± 2.64	Brown	Ovoid
IT07K-210-1-1	IITA	8.18 ± 0.1	2.22 ± 0	0.32 ± 0	3.2 ± 0.28	86 ± 2.83	6.93 ± 1.33	4.6 ± 0.63	13.77 ± 2.4	White	Rhomboid
IT07K-230-2-9	IITA	9.09 ± 0.03	3.73 ± 0	0.33 ± 0	2.45 ± 0.21	74 ± 2.83	7.4 ± 1.06	4.93 ± 0.59	12.8 ± 2.01	White	Rhomboid
IT07K-297-13	IITA	7.4 ± 0.1	2.68 ± 0	0.39 ± 0	2.6 ± 0.14	82 ± 4.24	7.47 ± 1.3	4.67 ± 0.72	16.4 ± 4.76	White	Rhomboid
IT07K-299-6	IITA	18.34 ± 0.1	1.6 ± 0	1.2 ± 0	2.85 ± 0.64	75 ± 2.83	7.13 ± 1.6	4.6 ± 0.74	13.83 ± 1.1	White	Kidney
IT07K-318-33	IITA	11.7 ± 0.25	1.17 ± 0	0.35 ± 0	2.65 ± 0.64	64.5 ± 2.12	8.47 ± 0.99	5.73 ± 0.8	15.13 ± 2.96	Brown	Ovoid
IT08K-150-12	IITA	8 ± 0.15	1.72 ± 0	0.47 ± 0	3.65 ± 0.21	58.5 ± 2.12	8.07 ± 0.8	5.27 ± 0.59	18.77 ± 6.2	White	Rhomboid
IT08K-180-11	IITA	4.36 ± 0.07	1.48 ± 0	0.28 ± 0	3.85 ± 1.34	73.5 ± 2.12	7.6 ± 1.12	5.13 ± 0.64	14.27 ± 0.67	White	Rhomboid
IT09K-227-9	IITA	8.61 ± 0.1	1.87 ± 0	0.43 ± 0	3.6 ± 1.41	78.5 ± 2.12	6.8 ± 0.94	4.73 ± 0.59	10.63 ± 0.4	Brown	Rhomboid
IT10K-817-1A	IITA	6.16 ± 0.15	4.43 ± 0	0.31 ± 0	4 ± 0.14	62.5 ± 2.12	7.4 ± 0.99	4.8 ± 0.56	14.67 ± 1.55	Reddish-brown	Ovoid
IT10K-817-1B	IITA	15.28 ± 0.1	1.36 ± 0	0.39 ± 0	2.85 ± 0.64	96.5 ± 2.12	7.73 ± 1.44	5.07 ± 0.7	13.7 ± 1.95	Reddish-brown	Ovoid
IT10K-817-3	IITA	4.38 ± 0.15	1.52 ± 0	0.38 ± 0	4.1 ± 0.14	67.5 ± 2.12	7.67 ± 0.9	5 ± 0.76	16.37 ± 2.2	Reddish-brown	Rhomboid
IT10K-817-7	IITA	10.6 ± 0.1	2.4 ± 0	0.37 ± 0	3.6 ± 1.41	59.5 ± 2.12	7.53 ± 0.99	5 ± 0.76	14.83 ± 0.65	Reddish-brown	Rhomboid
IT10K-834-3	IITA	6.55 ± 0.1	1.33 ± 0	0.36 ± 0	1.6 ± 0	59 ± 2.83	6.93 ± 1.22	4.73 ± 0.8	15.93 ± 1.14	Mottled	Rhomboid
IT10K-973-1	IITA	8.15 ± 0.05	1.29 ± 0	0.37 ± 0	3.2 ± 0.28	68.5 ± 4.95	8 ± 1.31	5.33 ± 0.62	18.8 ± 5.58	White	Rhomboid
IT10K-985-3	IITA	11.31 ± 0.1	1.46 ± 0	0.38 ± 0.02	3.6 ± 1.41	78 ± 2.83	9.2 ± 1.08	5.2 ± 0.68	14.67 ± 5.17	White	Rhomboid
IT13K-1079-3	IITA	4.74 ± 0.05	1.09 ± 0	0.29 ± 0	3.1 ± 0.28	59 ± 2.83	7.73 ± 1.03	5.2 ± 0.94	20.17 ± 3.34	White	Rhomboid
IT-18	IITA	15.04 ± 0.15	1.44 ± 0	0.4 ± 0	3.5 ± 1.27	69 ± 2.83	6.2 ± 1.08	4.4 ± 0.51	8.57 ± 0.21	Brown	Ovoid
IT82E-16	Malawi	15.89 ± 0.05	3.17 ± 0	0.5 ± 0	4.2 ± 0.14	77 ± 2.83	6.07 ± 0.59	4.53 ± 0.64	10.8 ± 1.83	Reddish-brown	Rhomboid
IT835-728-5	IITA	6.41 ± 0.1	1.98 ± 0	0.45 ± 0	2.4 ± 0.14	130 ± 2.83	7.2 ± 0.86	4.6 ± 0.51	11.17 ± 1.12	White	Kidney
IT90K-76	IITA	4.06 ± 0.1	1.57 ± 0.01	0.31 ± 0	4.5 ± 0.28	78 ± 2.83	7.8 ± 1.01	5.07 ± 0.8	11.87 ± 1.12	Brown	Ovoid
IT93K-452-1	IITA	8.36 ± 0.05	1.46 ± 0	0.39 ± 0	4.7 ± 0.28	82 ± 8.49	7.2 ± 1.08	5.2 ± 0.68	17.4 ± 4.81	White	Rhomboid
IT97K-1069-6	IITA	10.85 ± 0.15	6.78 ± 0	0.38 ± 0	2.65 ± 0.64	69 ± 2.83	6.27 ± 0.59	4.6 ± 0.51	10.5 ± 0.95	Brown	Ovoid
IT97K-390-2	IITA	19.44 ± 0.15	6.53 ± 0	0.36 ± 0	4.2 ± 0.14	62 ± 2.83	7.4 ± 1.35	4.87 ± 0.52	10.2 ± 0.61	Brown	Ovoid
IT97K-499-35	IITA	13.08 ± 0.6	7.83 ± 0	0.81 ± 0	3.6 ± 1.41	73 ± 2.83	7.8 ± 1.32	5.4 ± 0.83	13.47 ± 0.55	White	Rhomboid
IT98K-131-2	IITA	8.82 ± 0.1	1.27 ± 0	0.37 ± 0.04	3.75 ± 1.34	46.5 ± 4.95	8.33 ± 0.72	5.47 ± 0.52	13.53 ± 3.82	Brown	Rhomboid
IT98K-205-8	IITA	9.38 ± 4.41	1.62 ± 0	0.26 ± 0	3.85 ± 1.34	78 ± 2.83	7.4 ± 1.3	5.07 ± 0.7	13.4 ± 0.36	White	Rhomboid
IT98K-390-2	IITA	9.6 ± 0.6	3.66 ± 0	0.45 ± 0	5.3 ± 0	82 ± 2.83	7.4 ± 0.99	4.93 ± 0.59	12.73 ± 1.56	Reddish-brown	Ovoid
IT98K-503-1	IITA	14.11 ± 0.05	1.92 ± 0	0.47 ± 0	3.5 ± 1.27	119 ± 2.83	7.87 ± 1.06	5.2 ± 0.68	14.37 ± 3.77	White	Rhomboid
IT99k-1122	IITA	12.73 ± 0.1	1.8 ± 0	0.31 ± 0	3.6 ± 1.41	77 ± 2.83	6.67 ± 1.5	5.33 ± 0.72	10.77 ± 1.62	Purple	Rhomboid
IT99K-241-2	IITA	12.48 ± 0.15	3.44 ± 0	0.42 ± 0	3.75 ± 1.34	57.5 ± 3.54	8.27 ± 0.96	5.47 ± 0.64	15.97 ± 4.37	White	Ovoid
IT99K-407-8	IITA	13.97 ± 0.25	1.49 ± 0	0.35 ± 0	3.4 ± 0.28	69 ± 2.83	6.6 ± 0.83	4.87 ± 0.64	14.23 ± 4.14	Brown	Ovoid
IT99K-409-8	IITA	12.51 ± 0.1	3.17 ± 0	0.4 ± 0	4.2 ± 0.14	87 ± 2.83	6.4 ± 0.91	4.67 ± 0.62	13.17 ± 4.88	Brown	Ovoid
IT99K-573-1-1	IITA	9.26 ± 0.28	5.96 ± 0.02	0.29 ± 0	2.45 ± 0.21	69 ± 2.83	8.6 ± 0.83	5.8 ± 1.21	17.67 ± 1.67	White	Rhomboid
IT99K-573-2-1	IITA	6.76 ± 0.6	1.84 ± 0	0.26 ± 0	3.65 ± 0.21	60 ± 2.83	7.6 ± 1.45	5.13 ± 0.92	12.6 ± 1.92	White	Rhomboid
IT99K-7-21-2-2-1	IITA	6.89 ± 0.17	1.54 ± 0	0.2 ± 0	2.55 ± 0.07	98 ± 2.83	7.53 ± 1.13	5.27 ± 0.8	16.83 ± 1.01	White	Rhomboid
Mkanakaufiti	Malawi	7.72 ± 0.1	1.72 ± 0	0.15 ± 0	5.3 ± 0	50 ± 2.83	8.27 ± 0.7	5.53 ± 0.83	11.73 ± 1.76	Brown	Rhomboid
MWcp03	Malawi-Blantyre	6.08 ± 0.07	1.31 ± 0	0.21 ± 0	3.3 ± 0.28	77.5 ± 2.12	10.33 ± 0.98	6.67 ± 1.05	23.7 ± 1.56	Purple	Ovoid
MWcp04	Malawi-Blantyre	8.5 ± 0.05	1.16 ± 0	0.32 ± 0	4.7 ± 0.28	91 ± 2.83	8 ± 1.77	5.27 ± 0.7	20.97 ± 2.78	Reddish-brown	Rhomboid
MWcp05	Malawi-Blantyre	12.87 ± 0.4	1.79 ± 0	0.4 ± 0	4.8 ± 0.28	80 ± 5.66	8.87 ± 1.25	5.33 ± 0.49	16.3 ± 6.67	White	Rhomboid
MWcp06	Malawi-Blantyre	12.66 ± 0.1	1.43 ± 0	0.36 ± 0	3.2 ± 0.28	103 ± 2.83	8.33 ± 1.23	5.53 ± 0.74	14.7 ± 1.47	Brown	Ovoid
MWcp07	Malawi-Chikwawa	8.87 ± 0.55	1.79 ± 0	0.22 ± 0	2.65 ± 0.64	191 ± 7.07	8.47 ± 0.74	5.8 ± 0.68	12.8 ± 1.32	Mottled	Ovoid
MWcp08	Malawi-Chikwawa	12.62 ± 0.25	2.75 ± 0	0.31 ± 0	3.85 ± 1.34	119 ± 2.83	6.53 ± 0.99	5.2 ± 0.77	16.67 ± 0.9	Reddish-brown	Rhomboid
MWcp09	Malawi-Chikwawa	11.31 ± 0.1	3.07 ± 0	0.14 ± 0	4.9 ± 0.28	81 ± 2.83	8.93 ± 2.19	6.47 ± 1.46	16.63 ± 1.44	Purple	Ovoid
MWcp10	Malawi-Chikwawa	5.83 ± 0.07	1.74 ± 0	0.21 ± 0	3.2 ± 0.28	108 ± 2.83	7.73 ± 1.03	5.2 ± 0.68	12.95 ± 6.15	Brown	Ovoid
MWcp11	Malawi-Chikwawa	11.48 ± 0.45	5.17 ± 0	0.3 ± 0	3.3 ± 0.28	110 ± 2.83	6.53 ± 0.74	5.07 ± 0.46	12.17 ± 0.21	Brown	Ovoid
MWcp15	Malawi-Chikwawa	12.7 ± 0.07	1.07 ± 0	0.32 ± 0	2.55 ± 0.07	74 ± 2.83	8.53 ± 1.36	6 ± 1	18.93 ± 4.45	Purple	Ovoid
MWcp17	Malawi-Chikwawa	7.33 ± 0.2	1.12 ± 0	0.32 ± 0	4.2 ± 0.14	159.5 ± 0.71	8.73 ± 1.33	5.8 ± 0.77	14.63 ± 5.55	White	Rhomboid
MWcp18	Malawi-TO	7.43 ± 0.1	1.93 ± 0	0.15 ± 0	2.45 ± 0.21	91 ± 2.83	7.33 ± 1.59	5 ± 0.85	14.27 ± 5.92	Brown	Ovoid
MWcp19	Malawi-Mulanje	9 ± 0.05	1.78 ± 0	0.39 ± 0	3.2 ± 0.28	99 ± 2.83	8.13 ± 0.92	5.87 ± 0.64	20.53 ± 2.75	Reddish-brown	Rhomboid
MWcp20	Malawi-Mulanje	9 ± 0.03	1.74 ± 0	0.13 ± 0	4 ± 0.14	94 ± 2.83	7.93 ± 0.96	5.07 ± 0.7	17.27 ± 2.54	Reddish-brown	Rhomboid
MWcp21	Malawi-Mulanje	12.27 ± 0.15	2.42 ± 0	0.33 ± 0	3.5 ± 1.27	127 ± 2.83	9.07 ± 1.03	5.93 ± 0.7	17.33 ± 4.02	Purple	Ovoid
MWcp2227	Malawi-Gabu	10.05 ± 0.07	2.62 ± 0	0.36 ± 0	5.2 ± 0	83 ± 2.83	6.8 ± 1.26	4.6 ± 0.63	11.43 ± 0.81	Brown	Ovoid
MWcp2232	Malawi-Gabu	14.47 ± 0.05	6.65 ± 0	0.37 ± 0	3.6 ± 1.41	77 ± 2.83	6.07 ± 0.7	4.47 ± 0.52	8.5 ± 0.53	Brown	Ovoid
MWcp23	Malawi-Mulanje	12.98 ± 0.45	4.66 ± 0	0.37 ± 0	5 ± 0	100 ± 2.83	7.6 ± 1.24	5.33 ± 0.9	12.17 ± 0.38	Reddish-brown	Ovoid
MWcp24	Malawi-Mulanje	10.7 ± 0.05	2 ± 0	0.31 ± 0	4.4 ± 0.28	99.5 ± 0.71	8.87 ± 0.74	6.2 ± 0.86	21.03 ± 1.24	Reddish-brown	Rhomboid
MWcp25	Malawi-Mulanje	8.15 ± 0.05	1.15 ± 0	0.35 ± 0	4 ± 0.14	109 ± 2.83	7.87 ± 1.06	5.13 ± 0.74	12.87 ± 0.25	Brown	Ovoid
MWcp26	Malawi-Chiradzulu	9.53 ± 0.1	0.12 ± 0	0.09 ± 0	3.85 ± 1.34	127 ± 2.83	8.93 ± 1.28	5.53 ± 0.83	17.7 ± 0.44	Purple	Ovoid
MWcp27	Malawi-Chiradzulu	8.68 ± 0.1	2.02 ± 0	0.27 ± 0	4.6 ± 0.28	78 ± 2.83	6.07 ± 0.7	4.93 ± 0.7	11.97 ± 2.97	Brown	Ovoid
MWcp28	Malawi-Chiradzulu	4.66 ± 0	1.85 ± 0	0.24 ± 0	4 ± 0.14	72 ± 2.83	7.2 ± 0.86	5.2 ± 0.68	14.07 ± 1.67	Brown	Ovoid
MWcp29	Malawi-Chiradzulu	15.57 ± 0.2	3.95 ± 0	0.29 ± 0	4 ± 0.14	171.5 ± 6.36	9.13 ± 0.92	6.33 ± 0.72	16.13 ± 2.11	Purple	Ovoid
MWcp30	Malawi-Chiradzulu	12.59 ± 0.2	2.5 ± 0	0.36 ± 0	3.85 ± 1.34	53 ± 2.83	5.93 ± 0.7	4.87 ± 1.13	11.63 ± 1.39	Reddish-brown	Ovoid
MWcp305	Malawi-Gabu	22.21 ± 0.85	6.56 ± 0	0.34 ± 0	4.6 ± 0.28	73 ± 2.83	5.8 ± 0.86	4.8 ± 0.68	11.77 ± 2.62	Brown	Ovoid
MWcp309	Malawi-Gabu	8.29 ± 0.25	3.12 ± 0	0.25 ± 0	3.4 ± 0.28	97 ± 2.83	6.27 ± 0.88	4.47 ± 0.52	11.9 ± 3.73	Brown	Ovoid
MWcp31	Malawi-Chiradzulu	10.03 ± 0.1	2.96 ± 0	0.71 ± 0	3.2 ± 0.28	145 ± 2.83	6.6 ± 1.24	4.8 ± 0.68	8.97 ± 0.57	Brown	Ovoid
MWcp32	Malawi-Chiradzulu	7.21 ± 0.07	1.6 ± 0	0.14 ± 0	3.75 ± 1.34	88.5 ± 2.12	8.07 ± 1.22	5.8 ± 0.94	18.83 ± 0.99	Reddish-brown	Rhomboid
MWcp3254	Malawi-Gabu	4.61 ± 0.07	2.87 ± 0	0.25 ± 0	4.1 ± 0.14	99 ± 4.24	6.6 ± 1.12	4.47 ± 0.52	8.87 ± 0.95	Brown	Ovoid
MWcp33	Malawi-Zomba	5.73 ± 0.35	1.95 ± 0	0.39 ± 0	3.9 ± 0.14	95 ± 4.24	9.6 ± 1.3	6.33 ± 1.11	18.37 ± 2.89	Reddish-brown	Rhomboid
MWcp34	Malawi-Zomba	15.28 ± 0.1	1.4 ± 0	0.38 ± 0	2.5 ± 0	114 ± 4.24	7.2 ± 0.86	5.53 ± 0.64	15.27 ± 3.61	Reddish-brown	Rhomboid
MWcp35	Malawi-Zomba	11.98 ± 0.05	2.48 ± 0	0.25 ± 0	3.6 ± 1.41	105 ± 4.24	8.73 ± 1.16	5.73 ± 0.7	19.07 ± 2.57	Purple	Ovoid
MWcp36	Malawi-Zomba	17.98 ± 0.3	6.42 ± 0	0.38 ± 0	2.2 ± 0	101 ± 4.24	9.33 ± 1.29	6.53 ± 1.06	26.13 ± 0.67	Brown	Rhomboid
MWcp37	Malawi-Zomba	7.9 ± 0.2	14.64 ± 0	2.63 ± 0	3.6 ± 1.41	74 ± 4.24	9.13 ± 1.19	5.87 ± 0.92	14.83 ± 2.19	Brown	Rhomboid
MWcp38	Malawi-Machinga	14.5 ± 0.1	1.12 ± 0	0.31 ± 0	3.75 ± 1.34	129 ± 4.24	8.6 ± 1.06	5.93 ± 0.7	18.23 ± 1.66	Purple	Ovoid
MWcp39	Malawi-Machinga	8.68 ± 0.07	1.79 ± 0	0.24 ± 0	2.75 ± 0.64	89.5 ± 2.12	8.07 ± 1.03	5.53 ± 0.64	17.8 ± 5.96	Reddish-brown	Ovoid
MWcp40	Malawi-Machinga	11.84 ± 0.05	1.51 ± 0	0.38 ± 0	3.85 ± 1.34	49.5 ± 2.12	9.4 ± 0.91	6.6 ± 0.83	18.7 ± 3.7	Purple	Ovoid
MWcp41	Malawi-Machinga	7.72 ± 0.15	0.73 ± 0	0.13 ± 0	3.75 ± 1.34	90.5 ± 3.54	7.13 ± 1.51	5.13 ± 0.52	13.9 ± 2.26	Brown	Ovoid
MWcp43	Malawi-Mangochi	13.05 ± 0.05	4.45 ± 0	0.36 ± 0	3.65 ± 0.21	181 ± 1.41	8.47 ± 0.83	5.6 ± 0.63	15.53 ± 4.52	White	Rhomboid
MWcp44	Malawi-Mangochi	10.37 ± 0.03	4.71 ± 0.01	0.3 ± 0	3.6 ± 1.41	90.5 ± 2.12	10.13 ± 1.55	7.13 ± 1.25	16.1 ± 2.43	Brown	Rhomboid
MWcp45	Malawi-Mangochi	11.31 ± 0.1	5.01 ± 0	0.31 ± 0	4.3 ± 0.14	73.5 ± 2.12	8.67 ± 1.35	6 ± 1.07	21.3 ± 0.7	Reddish-brown	Rhomboid
MWcp46	Malawi-Mangochi	4.09 ± 0.03	2 ± 0	0.23 ± 0	2.4 ± 0	180.5 ± 0.71	8.6 ± 0.99	6.27 ± 0.88	17.87 ± 4.45	Mottled	Rhomboid
MWcp47	Malawi-Mangochi	12.94 ± 0.5	2.5 ± 0	0.34 ± 0	2.65 ± 0.64	91.5 ± 2.12	8 ± 1	5.53 ± 0.64	15.77 ± 0.58	Reddish-brown	Rhomboid
MWcp479	Malawi-Gabu	13.05 ± 0.05	1.66 ± 0	0.36 ± 0.03	3.1 ± 0.28	95.5 ± 2.12	5.53 ± 1.3	4.6 ± 0.99	10.2 ± 0.46	Brown	Ovoid
MWcp48	Malawi-Mangochi	4.17 ± 0.15	1.9 ± 0	1.77 ± 0.02	3.85 ± 1.34	76.5 ± 0.71	9.53 ± 0.92	6.33 ± 0.82	20.5 ± 2.62	Purple	Ovoid
MWcp49	Malawi-Mangochi	14.82 ± 0.15	5.31 ± 0	0.33 ± 0	3.75 ± 0.21	70 ± 0	9.6 ± 1.24	6.8 ± 0.86	19.9 ± 3.82	Brown	Ovoid
MWcp50	Malawi-Dedza	3.64 ± 0.1	1.67 ± 0	0.24 ± 0	2.85 ± 0.64	129.5 ± 0.71	9.2 ± 1.21	5.67 ± 0.9	16.07 ± 0.64	Purple	Ovoid
MWcp51	Malawi-Dedza	12.66 ± 0.1	4.7 ± 0.01	0.35 ± 0	3.3 ± 0.28	71.5 ± 2.12	7.33 ± 0.82	5.4 ± 0.74	15.7 ± 2.05	Reddish-brown	Rhomboid
MWcp52	Malawi-Dedza	5.87 ± 0.15	3.61 ± 0	0.36 ± 0	3.5 ± 1.27	91.5 ± 4.95	9.2 ± 1.26	5.73 ± 0.88	15.9 ± 1.4	White	Rhomboid
MWcp53	Malawi-Dedza	15.67 ± 0.25	5.28 ± 0	1.42 ± 0	3.75 ± 1.34	115.5 ± 3.54	8.73 ± 1.28	5.93 ± 0.59	21 ± 4.75	Reddish-brown	Ovoid
MWcp54	Malawi-Dedza	14.5 ± 0.1	4.55 ± 0	0.34 ± 0	4.1 ± 0.14	171 ± 5.66	7.73 ± 1.39	5.33 ± 0.9	16.73 ± 5.64	Mottled	Rhomboid
MWcp55	Malawi-Dedza	7.43 ± 0.1	1.6 ± 0	0.12 ± 0	3.5 ± 1.27	97.5 ± 2.12	8.13 ± 1.46	5.4 ± 1.06	15.47 ± 2.45	Reddish-brown	Rhomboid
MWcp57	Malawi-Dedza	5.51 ± 0.03	5.28 ± 0	0.25 ± 0	4.3 ± 0.14	108.5 ± 2.12	9.13 ± 1.13	6.47 ± 0.83	17.4 ± 3.37	Brown	Ovoid
MWcp58	Malawi-Dedza	11.16 ± 0.1	1.47 ± 0	0.3 ± 0	3.6 ± 1.41	86.5 ± 2.12	6.87 ± 0.64	4.87 ± 0.64	14.67 ± 4.84	Brown	Ovoid
MWcp59	Malawi-Salima	18.62 ± 0.2	6.35 ± 0	0.29 ± 0	3.2 ± 0.28	80.5 ± 2.12	8.67 ± 0.98	5.6 ± 0.74	18.43 ± 5.6	Reddish-brown	Ovoid
MWcp60	Malawi-Salima	9.39 ± 0.1	1.37 ± 0	0.12 ± 0	3.1 ± 0.28	113.5 ± 2.12	8.13 ± 1.13	6.13 ± 0.74	22.23 ± 1.53	Reddish-brown	Rhomboid
MWcp601	Malawi-Gabu	4.19 ± 0.03	1.89 ± 0	0.22 ± 0	4.3 ± 0.14	82 ± 8.49	6.8 ± 0.94	4.93 ± 0.7	12.13 ± 2.58	Brown	Ovoid
MWcp61	Malawi-Salima	9.85 ± 0.05	1.69 ± 0	0.41 ± 0	4.6 ± 0.28	160.5 ± 3.54	8.27 ± 1.22	5.27 ± 0.88	15.07 ± 1.55	Mottled	Ovoid
MWcp62	Malawi-Salima	11.03 ± 0.07	1.59 ± 0	0.36 ± 0	3.75 ± 1.34	112.5 ± 2.12	8.73 ± 1.22	5.8 ± 0.86	15.07 ± 2.51	White	Rhomboid
MWcp63	Malawi-Salima	15.46 ± 0.15	2.02 ± 0	0.37 ± 0	3.2 ± 0.28	91.5 ± 2.12	9.73 ± 1.1	6.27 ± 0.96	20.73 ± 4.95	Purple	Ovoid
MWcp64	Malawi-Salima	14.25 ± 0.05	1.61 ± 0	0.31 ± 0	3.3 ± 0.28	167.5 ± 0.71	5.67 ± 4.19	4.53 ± 3.36	20 ± 4.38	Brown	Ovoid
MWcp645	Malawi-Salima	11.06 ± 0.15	3.68 ± 0	0.37 ± 0	2.55 ± 0.07	92.5 ± 2.12	7.13 ± 0.92	5.33 ± 0.62	12.1 ± 0.2	Brown	Ovoid
MWcp65	Malawi-Lilongwe	17.13 ± 0.2	3.71 ± 0	0.96 ± 0	2.85 ± 0.64	58.5 ± 4.95	9.27 ± 1.33	6.73 ± 0.88	17.27 ± 4.5	Purple	Ovoid
MWcp66	Malawi-Lilongwe	8.5 ± 0.05	1.65 ± 0	0.37 ± 0	3.85 ± 1.34	131.5 ± 0.71	7 ± 1	5.13 ± 0.64	16.53 ± 6.45	Brown	Ovoid
MWcp67	Malawi-Lilongwe	8.5 ± 0.1	1.56 ± 0	0.24 ± 0	4.1 ± 0.14	78.5 ± 2.12	7.8 ± 0.94	5.53 ± 0.52	22.57 ± 3.32	Reddish-brown	Rhomboid
MWcp68	Malawi-Dedza	12.27 ± 0.15	1.65 ± 0	0.38 ± 0	2.4 ± 0.14	80.5 ± 2.12	7.8 ± 0.77	5.6 ± 0.63	15.4 ± 4.36	Brown	Ovoid
MWcp69	Malawi-Nsanje	21.21 ± 0.75	8.67 ± 0	0.39 ± 0	4.5 ± 0.28	64.5 ± 2.12	9.27 ± 1.1	5.87 ± 1.13	14.9 ± 3.93	Purple	Ovoid
MWcp71	Malawi-Nsanje	15.5 ± 0.2	7.67 ± 0	0.77 ± 0	4.5 ± 0.28	92 ± 1.41	9.27 ± 0.88	5.93 ± 0.7	18.93 ± 0.67	Brown	Ovoid
MWcp72	Malawi-Nsanje	11.48 ± 0.15	2.32 ± 0	0.32 ± 0	3.2 ± 0.28	116 ± 1.41	10.13 ± 1.06	6.33 ± 0.72	18.07 ± 1.25	White	Rhomboid
MWcp73	Malawi-Dedza	11.06 ± 0.05	1.37 ± 0	0.39 ± 0	2.85 ± 0.64	99 ± 1.41	8.93 ± 1.03	5.8 ± 0.56	15 ± 2.18	Brown	Rhomboid
MWcp76	Malawi-Mzimba	10.71 ± 0.03	7.59 ± 0	0.36 ± 0	3.6 ± 1.41	83 ± 1.41	8.67 ± 1.29	5.8 ± 0.68	14.33 ± 0.32	Brown	Ovoid
MWcp91	Malawi-Mzimba	11.09 ± 0.2	4.29 ± 0	0.32 ± 0	4.9 ± 0.28	124 ± 1.41	7.87 ± 1.19	5.6 ± 0.63	15.3 ± 3.15	Reddish-brown	Ovoid
MZcp 004	Mozambique	3.63 ± 0.07	1.98 ± 0	0.17 ± 0	3.75 ± 0.21	81 ± 1.41	7 ± 0.76	5.07 ± 0.7	11.97 ± 5.13	Brown	Ovoid
MZcp 011	Mozambique	8.63 ± 0.97	1.58 ± 0	0.25 ± 0	3.75 ± 1.34	98 ± 1.41	7.27 ± 1.03	4.6 ± 0.63	13.63 ± 3.82	White	Ovoid
MZcp 012	Mozambique	12.76 ± 0.05	3.18 ± 0	0.35 ± 0	3.2 ± 0.28	80 ± 1.41	7.53 ± 1.13	5 ± 0.65	10 ± 1.85	Brown	Ovoid
MZcp 013	Mozambique	15.46 ± 0.15	5.92 ± 0	0.32 ± 0	2.1 ± 0.14	75 ± 1.41	7.4 ± 1.24	5.13 ± 0.74	12.3 ± 0.95	Brown	Ovoid
MZcp 014	Mozambique	6.05 ± 0.9	2.21 ± 0	0.12 ± 0	2.75 ± 0.64	112 ± 5.66	7.33 ± 1.68	4.67 ± 0.62	8.9 ± 0.96	Brown	Ovoid
MZcp 015	Mozambique	8.68 ± 0.1	1.95 ± 0	0.39 ± 0	2.75 ± 0.64	124 ± 1.41	8.53 ± 1.3	5.53 ± 0.64	16.67 ± 4.4	Brown	Ovoid
MZcp 016	Mozambique	4.66 ± 0.07	1.86 ± 0	0.17 ± 0	4.5 ± 0.28	88 ± 1.41	7.07 ± 1.33	5.47 ± 0.74	12.37 ± 0.5	Purple	Ovoid
MZcp 020	Mozambique	14.96 ± 0.45	8.42 ± 0.01	0.38 ± 0	3.1 ± 0.28	59 ± 0	8.33 ± 0.98	5.67 ± 0.72	16.37 ± 3	Brown	Ovoid
MZcp 021	Mozambique	13.44 ± 0.2	1.4 ± 0	0.4 ± 0	3.5 ± 1.27	63 ± 5.66	8.47 ± 0.92	5.8 ± 0.68	18.73 ± 2.82	Brown	Ovoid
MZcp 022	Mozambique	6.03 ± 0.07	1.29 ± 0	0.19 ± 0	3.3 ± 0.28	107 ± 5.66	7.6 ± 1.12	5.2 ± 0.68	12.1 ± 2.16	Mottled	Ovoid
MZcp 023	Mozambique	14.22 ± 0.1	2 ± 0	0.37 ± 0	4 ± 0.14	66 ± 5.66	7.93 ± 1.16	5.27 ± 0.7	13.77 ± 3.76	Brown	Ovoid
MZcp 024	Mozambique	20.97 ± 0.6	5 ± 0	0.34 ± 0	2.5 ± 0	87 ± 5.66	7.67 ± 1.23	5.93 ± 0.59	15.17 ± 3.81	Brown	Ovoid
MZcp 025	Mozambique	11.13 ± 0.05	1.15 ± 0	0.32 ± 0	2.75 ± 0.64	72.5 ± 3.54	7.53 ± 1.64	6.13 ± 0.99	14.2 ± 3.41	Brown	Ovoid
MZcp 026	Mozambique	15.25 ± 0.45	4.39 ± 0	0.37 ± 0	3.75 ± 1.34	82.5 ± 3.54	9.4 ± 0.83	6.87 ± 0.99	18.57 ± 0.45	Brown	Ovoid
MZcp 030	Mozambique	10.06 ± 0.15	1.38 ± 0	0.41 ± 0	4.6 ± 0.28	97.5 ± 3.54	7.2 ± 0.94	4.87 ± 0.64	14.33 ± 5.03	Brown	Ovoid
MZcp 032	Mozambique	12.94 ± 0.1	2.25 ± 0	0.36 ± 0	4.1 ± 0.14	80.5 ± 3.54	6.67 ± 1.35	4.67 ± 0.72	10.3 ± 2.55	Brown	Ovoid
MZcp 044	Mozambique	9.04 ± 0.03	1.84 ± 0	0.18 ± 0	4.1 ± 0.14	89.5 ± 3.54	6.93 ± 1.39	4.93 ± 0.88	10.27 ± 0.8	Brown	Ovoid
MZcp 045	Mozambique	12.73 ± 0.2	1.27 ± 0	0.34 ± 0.01	2.65 ± 0.64	80.5 ± 3.54	6.6 ± 1.06	4.6 ± 0.51	8.33 ± 0.75	Brown	Ovoid
MZcp 046	Mozambique	13.22 ± 0.8	1.76 ± 0	0.4 ± 0	3.2 ± 0.28	58.5 ± 3.54	5.2 ± 1.66	4.13 ± 0.64	11.2 ± 5.37	Brown	Ovoid
Raha 1	Tanzania	7.3 ± 0.07	1.87 ± 0	0.08 ± 0			7 ± 0.76	4.87 ± 0.64	12.67 ± 4.1	Brown	Ovoid
Raha 2	Tanzania	13.47 ± 0.05	2.24 ± 0	0.37 ± 0	4.9 ± 0	81 ± 5.66	6.07 ± 1.1	4.47 ± 0.64	10.63 ± 0.58	Brown	Ovoid
Sanzi	Ghana	8.82 ± 0.1	3.12 ± 0	0.4 ± 0	4 ± 0.14	72.5 ± 3.54	5.8 ± 0.77	4 ± 0.53	9.97 ± 3.48	Purple	Rhomboid
Sudani 1	Malawi	13.51 ± 0.1	4.69 ± 0	0.48 ± 0	4.5 ± 0.28	79 ± 4.24	6.07 ± 0.59	4.27 ± 0.59	13.03 ± 6.16	Brown	Ovoid
Tumaini	Tanzania	11.24 ± 0.1	1.5 ± 0	0.57 ± 0	3.6 ± 1.41	87.5 ± 2.12	6.8 ± 1.66	4.87 ± 0.74	9.03 ± 0.64	Brown	Ovoid
TVu-10008	Unknown	11.91 ± 0.05	1.46 ± 0	0.38 ± 0	2.95 ± 0.64	76.5 ± 0.71	8.73 ± 0.96	5.07 ± 0.59	15.53 ± 4.77	White	Rhomboid
TVu-1002	USA	8.8 ± 0.03	1.85 ± 0	0.19 ± 0	4.6 ± 0.28	83.5 ± 0.71	7.53 ± 0.92	5.2 ± 0.77	11.35 ± 2.9	White	Kidney
TVu-10035	Nigeria	17.34 ± 0.1	5.33 ± 0	0.32 ± 0	4.6 ± 0.28	78.5 ± 0.71	7.73 ± 1.58	5.07 ± 0.7	13.2 ± 2.6	White	Rhomboid
TVu-1006	USA	7.06 ± 0.07	3.74 ± 0	0.43 ± 0	3.75 ± 1.34	128.5 ± 3.54	7.67 ± 0.98	5.13 ± 0.64	13.5 ± 0.4	Brown	Ovoid
TVu-1007	USA	10.95 ± 0.1	2.6 ± 0	0.43 ± 0	4.4 ± 0.28	76.5 ± 3.54	7.4 ± 1.12	4.93 ± 0.88	12.23 ± 1.63	Brown	Ovoid
TVu-1010	USA	12.23 ± 0.1	3.72 ± 0	0.37 ± 0	3.75 ± 1.34	74.5 ± 0.71	6.87 ± 1.19	4.6 ± 0.63	10.47 ± 0.57	White	Ovoid
TVu-1015	USA	4.29 ± 0.1	1.58 ± 0	0.27 ± 0	3.65 ± 0.21	65.5 ± 0.71	6.8 ± 0.94	4.8 ± 0.77	13.4 ± 3.05	Brown	Ovoid
TVu-10169	India	20.18 ± 0.7	1.93 ± 0	0.33 ± 0	3.5 ± 1.27	103.5 ± 0.71	6.27 ± 1.28	3.8 ± 0.56	6 ± 1.42	Black	Rhomboid
TVu-10180	India	8.47 ± 0.1	1.42 ± 0	0.33 ± 0	3.4 ± 0.28	76.5 ± 0.71	5.67 ± 0.98	4 ± 0.65	8.9 ± 1.15	Purplish- brown	Ovoid
TVu-1042	Unknown	8.36 ± 0.17	2.13 ± 0	0.22 ± 0	3.6 ± 1.41	65.5 ± 0.71	7.53 ± 1.19	4.93 ± 0.8	15.7 ± 6.4	Mottled	Ovoid
TVu-10987	Benin	12.23 ± 0.1	1.5 ± 0	0.36 ± 0	4.7 ± 0.28	84.5 ± 0.71	7.6 ± 0.63	5 ± 0.76	11.37 ± 1.08	Brown	Rhomboid
TVu-11372	Cameroon	11.45 ± 0.2	2.96 ± 0	0.32 ± 0.02	4.1 ± 0.14	101.5 ± 0.71	5.27 ± 0.7	4.13 ± 0.64	8.43 ± 2.66	Brown	Ovoid
TVu-1143	USA	13.93 ± 0.1	12.9 ± 0	0.27 ± 0	4.5 ± 0.28	86.5 ± 0.71	6.4 ± 0.83	4.87 ± 0.74	13.1 ± 1.57	Reddish-brown	Ovoid
TVu-1146	USA	17.06 ± 5.32	9.03 ± 0	0.6 ± 0	3.75 ± 1.34	83.5 ± 0.71	6.53 ± 0.64	4.8 ± 0.56	13.2 ± 1.28	White	Ovoid
TVu-1149	USA	13.44 ± 0.1	4.73 ± 0	0.37 ± 0	3.5 ± 1.27	82.5 ± 0.71	6.67 ± 1.23	4.47 ± 0.92	10.1 ± 0.9	White	Kidney
TVu-11674	Zambia	9.34 ± 0.1	5.41 ± 0	0.28 ± 0	2.95 ± 0.64	137.5 ± 0.71	6.33 ± 0.98	4.73 ± 0.59	9.33 ± 0.78	Brown	Rhomboid
TVu-1177	Uganda	7.15 ± 0.05	8.63 ± 0	0.31 ± 0	2.55 ± 0.07	61.5 ± 0.71	5.67 ± 0.62	3.73 ± 0.46	7.77 ± 0.4	Brown	Ovoid
TVu-1178	Uganda	15.07 ± 0.1	1.01 ± 0	0.34 ± 0	3.4 ± 0.28	95.5 ± 2.12	7.07 ± 0.7	4.6 ± 0.74	9.93 ± 1.11	Brown	Ovoid
TVu-1185	Uganda	5.07 ± 0.03	3.8 ± 0	0.21 ± 0	3.65 ± 0.21	61.5 ± 0.71	6 ± 0.65	4.2 ± 0.56	10.67 ± 5.87	Mottled	Rhomboid
TVu-12256	Niger	5.2 ± 0.07	3.23 ± 0	0.24 ± 0	3.1 ± 0.28	66.5 ± 0.71	7.67 ± 1.18	4.87 ± 0.64	12.83 ± 0.97	Brown	Rhomboid
TVu-13265	USA	9.53 ± 0.1	1.14 ± 0	0.34 ± 0	3.85 ± 1.34	49.5 ± 2.12	8.93 ± 1.58	5.13 ± 0.64	15.4 ± 0.78	White	Kidney
TVu-13413	Zambia	10.45 ± 0.1	1.37 ± 0	0.33 ± 0	1.85 ± 0.07	71.5 ± 2.12	6.93 ± 1.03	5.07 ± 0.59	12 ± 0.46	Brown	5
TVu-13600	Botswana	12.3 ± 0.2	3.05 ± 0	0.39 ± 0	4.3 ± 0.14	53.5 ± 0.71	6.13 ± 0.74	4.6 ± 0.63	10.4 ± 2.43	White	Rhomboid
TVu-14004	Zambia	14.33 ± 0.15	4 ± 0	0.25 ± 0	3.6 ± 1.41	49.5 ± 2.12	9.8 ± 0.77	5.73 ± 0.7	20.93 ± 4.16	White	Kidney
TVu-14528	Senegal	11.88 ± 0.1	1.22 ± 0	0.34 ± 0	4.3 ± 0.14	87 ± 2.83	5.73 ± 0.88	4.2 ± 0.77	8.73 ± 1.78	Brown	Ovoid
TVu-1460	Unknown	18.27 ± 0.1	2.44 ± 0	0.85 ± 0	3.3 ± 0.28	57 ± 2.83	7.53 ± 1.3	4.13 ± 0.74	9.57 ± 0.81	Brown	Rhomboid
TVu-1472	Argentina	7.33 ± 0.3	0.82 ± 0	0.08 ± 0.01	3.4 ± 0.28	68 ± 2.83	6.53 ± 0.64	4.53 ± 0.52	8.5 ± 0.66	Reddish-brown	Ovoid
TVu-1473	India	9.67 ± 0.2	2.46 ± 0	0.47 ± 0	4.1 ± 0.14	85 ± 2.83	6.67 ± 1.23	4.6 ± 0.74	14.33 ± 4.26	Purple	Ovoid
TVu-14745	Botswana	10.42 ± 0.05	2.17 ± 0	0.29 ± 0	3.75 ± 1.34	84 ± 2.83	5.87 ± 0.92	4.07 ± 0.88	9.37 ± 0.78	Purple	Rhomboid
TVu-1478	South Africa	15.14 ± 0.1	1.39 ± 0	0.37 ± 0	3.1 ± 0.28	57 ± 2.83	6.67 ± 0.82	4.53 ± 0.52	9.13 ± 1.01	Black	Ovoid
TVu-1482	USSR	10.38 ± 0.1	5.01 ± 0	0.41 ± 0	2.5 ± 0	115.5 ± 3.54	6 ± 0.76	4.4 ± 0.51	8.23 ± 0.68	Reddish-brown	Ovoid
TVu-14828	Senegal	7.29 ± 0.35	2.63 ± 0	0.41 ± 0	4.3 ± 0.14	102 ± 2.83	7.8 ± 0.86	5.6 ± 0.51	13.47 ± 0.21	Brown	Rhomboid
TVu-1483	USSR	20.04 ± 0.2	1.64 ± 0	0.43 ± 0	3.9 ± 0.14	99.5 ± 7.78	5.27 ± 0.88	4.33 ± 0.72	9.7 ± 2.69	Purplish- brown	Ovoid
TVu-1491	USA	16.14 ± 0.4	7.32 ± 0	0.44 ± 0	2.85 ± 0.64	52 ± 2.83	5.93 ± 1.28	4 ± 0.53	9.3 ± 2.33	White	Globose
TVu-1527	Unknown	9.42 ± 0.25	0.32 ± 0	0.1 ± 0	3.6 ± 1.41	63 ± 0	6.4 ± 0.74	4.8 ± 0.68	11.27 ± 4.52	Brown	Rhomboid
TVu-154	Nigeria	14.11 ± 0.55	1.63 ± 0	0.34 ± 0	3.65 ± 0.21	61 ± 0	6.87 ± 0.92	4.4 ± 0.74	13.67 ± 6.4	Mottled	Ovoid
TVu-15462	Zimbabwe	11.02 ± 0.3	3.66 ± 0	0.29 ± 0	2.95 ± 0.64	64 ± 0	7.73 ± 0.96	5.2 ± 0.77	17.07 ± 2.42	Red	Rhomboid
TVu-15631	Nigeria	12.55 ± 0.05	6.96 ± 0	0.36 ± 0	4.6 ± 0.28	39 ± 1.41	7.6 ± 1.12	4.8 ± 0.68	11.9 ± 2.51	Red	Kidney
TVu-15693	Nigeria	11.95 ± 0.1	2.3 ± 0	0.3 ± 0	4 ± 0.14	51.5 ± 4.95	8.33 ± 1.68	5.33 ± 0.82	13.3 ± 1.15	Brown	Kidney
TVu-15898	Ghana	15.67 ± 0.05	1.61 ± 0	0.34 ± 0	3.4 ± 1.27	86.5 ± 4.95	6.67 ± 0.9	4.67 ± 0.62	10.4 ± 0.7	Mottled	Ovoid
TVu-16325	Italy	15.5 ± 0.1	1.79 ± 0	0.34 ± 0	2.75 ± 0.64	72.5 ± 4.95	7.07 ± 0.7	4.73 ± 0.7	12.3 ± 1.3	Brown	Rhomboid
TVu-16664	Uganda	12.73 ± 0.1	1.01 ± 0	0.3 ± 0	3.55 ± 0.21	103.5 ± 4.95	6.8 ± 1.37	4.73 ± 0.59	9.93 ± 0.4	Reddish-brown	Ovoid
TVu-16816	Cameroon	19.4 ± 0.2	6.58 ± 0.01	0.56 ± 0	3.2 ± 0.28	120.5 ± 4.95	7.47 ± 1.25	5 ± 0.65	9.8 ± 0.53	Brown	Ovoid
TVu-16829	Unknown	8.21 ± 0.1	3.25 ± 0	0.19 ± 0	4.4 ± 0.28	71.5 ± 4.95	8.87 ± 1.13	5.13 ± 0.74	14.97 ± 1.42	Black	Kidney
TVu-17060	Zambia	13.72 ± 0.2	2 ± 0.01	1.19 ± 0	3.75 ± 1.34	67.5 ± 4.95	5.07 ± 0.8	3.87 ± 0.64	6.53 ± 0.65	Purple	Ovoid
TVu-17179	Nigeria	7.77 ± 0.03	2.85 ± 0	0.18 ± 0	4 ± 0.14	54.5 ± 3.54	7.8 ± 1.01	5.27 ± 0.8	14.17 ± 1.55	White	Rhomboid
TVu-17423	Nigeria	12.37 ± 0.3	5.81 ± 0	0.29 ± 0	4.25 ± 0.21	99.5 ± 4.95	7.73 ± 1.03	4.93 ± 0.7	10.93 ± 1.07	White	Rhomboid
TVu-17526	Unknown	5.1 ± 0.07	1.63 ± 0	0.23 ± 0	4.6 ± 0.28	70.5 ± 4.95	6 ± 0.76	4.2 ± 0.41	13.23 ± 6.95	White	Ovoid
TVu-17537	Unknown	19.37 ± 0.45	5.27 ± 0	0.33 ± 0	3.3 ± 0.28	96.5 ± 4.95	6.87 ± 1.51	4.8 ± 0.68	10.8 ± 0.8	Brown	Ovoid
TVu-17553	Unknown	7.19 ± 0.2	2.32 ± 0	0.29 ± 0	2.75 ± 0.64	97.5 ± 4.95	5.73 ± 0.59	4.4 ± 0.74	11.67 ± 4.65	Brown	Ovoid
TVu-17565	Unknown	6.2 ± 0.1	1.97 ± 0	0.19 ± 0	3.65 ± 0.21	64.5 ± 0.71	6.53 ± 0.74	4.53 ± 0.52	9.33 ± 6.22	Brown	Rhomboid
TVu-17611	Unknown	12.37 ± 0.1	2.67 ± 0	0.36 ± 0	3.75 ± 1.34	55.5 ± 4.95	6.47 ± 0.83	4.47 ± 0.52	10.87 ± 0.51	Brown	Ovoid
TVu-17657	Unknown	7.4 ± 0.1	1.18 ± 0	0.32 ± 0	4.3 ± 0.14	66.5 ± 4.95	8.6 ± 1.72	5.73 ± 0.88	15.63 ± 1.15	White	Rhomboid
TVu-17660	Unknown	4.52 ± 0.05	2.47 ± 0	0.3 ± 0	5.3 ± 0	79.5 ± 4.95	6.07 ± 0.7	4.4 ± 0.51	10.93 ± 5.54	Purple	Ovoid
TVu-17713	Unknown	5.73 ± 0.05	1.12 ± 0	0.28 ± 0	3.2 ± 0.28	84.5 ± 4.95	5.87 ± 1.3	4.47 ± 0.64	10.43 ± 1.55	Red	Ovoid
TVu-17721	Unknown	6.48 ± 0.2	1.23 ± 0	0.12 ± 0	3.65 ± 0.21	70.5 ± 3.54	6.2 ± 1.08	4.53 ± 0.64	9.53 ± 1.21	Reddish-brown	Rhomboid
TVu-17796	Nigeria	19.44 ± 0.35	7.56 ± 0	1.11 ± 0	2.95 ± 0.64	65.5 ± 3.54	5.27 ± 0.7	4.27 ± 0.59	9.1 ± 0.17	Purple	Rhomboid
TVu-1785	India	13.19 ± 0.05	1.76 ± 0	0.29 ± 0	4.1 ± 0.14	127.5 ± 3.54	7.2 ± 1.01	3.8 ± 0.56	8 ± 3.5	Reddish-brown	Kidney
TVu-1797	USA	10.6 ± 0.1	1.22 ± 0	0.34 ± 0	2.85 ± 0.64	49.5 ± 3.54	5.93 ± 0.96	4.4 ± 0.74	11.33 ± 5.67	Purple	Ovoid
TVu-1806	South Africa	7.29 ± 0.15	1.58 ± 0	0.38 ± 0.02	4.5 ± 0.28	52.5 ± 0.71	6.33 ± 0.62	4.13 ± 0.52	9.37 ± 0.49	Reddish-brown	Rhomboid
TVu-1909	Hungary	12.12 ± 0.05	1.53 ± 0	0.44 ± 0	4.1 ± 0.14	52 ± 1.41	6.4 ± 0.63	4.6 ± 0.51	11.17 ± 2	Brown	Ovoid
TVu-2098	USA	13.3 ± 0.4	2.36 ± 0	0.36 ± 0	4 ± 0.14	80 ± 5.66	6.6 ± 1.24	4.53 ± 0.64	12.83 ± 2.6	White	Ovoid
TVu-22	Philippines	9.22 ± 0	4.04 ± 0	0.35 ± 0	3.9 ± 0.14	47.5 ± 3.54	8.27 ± 1.79	4.53 ± 0.64	12.57 ± 2.63	Mottled	Kidney
TVu-2656	South Africa	13.79 ± 0.4	3.57 ± 0	0.3 ± 0	4.2 ± 0.14	78 ± 0	7.53 ± 1.77	4.87 ± 0.74	11 ± 0.72	Mottled	Rhomboid
TVu-2657	South Africa	10.38 ± 0.1	3.25 ± 0	0.43 ± 0	5.2 ± 0	73.5 ± 4.95	6.87 ± 1.36	4.93 ± 0.59	12.1 ± 2.77	Brown	Ovoid
TVu-2661	South Africa	11.45 ± 0.1	1.23 ± 0	0.25 ± 0	2.75 ± 0.64	49.5 ± 3.54	6.93 ± 0.96	4.87 ± 0.74	15.17 ± 5.35	Brown	Ovoid
TVu-2665	South Africa	16.92 ± 0.1	4.57 ± 0.02	0.33 ± 0	2.85 ± 0.64	68 ± 0	6.13 ± 0.92	4.33 ± 0.72	12.6 ± 5.13	Purple	Ovoid
TVu-267	USA	12.23 ± 0.1	1.26 ± 0	0.38 ± 0	3.85 ± 1.34	58 ± 0	7.2 ± 0.86	4.87 ± 0.64	13.47 ± 1.53	Brown	Ovoid
TVu-2685	India	12.27 ± 0.35	3.94 ± 0	0.47 ± 0	3.85 ± 1.34	73 ± 0	6.13 ± 0.83	4.53 ± 0.74	10.83 ± 7.51	Brown	Ovoid
TVu-2687	India	8.5 ± 0.45	0.74 ± 0	0.27 ± 0	2.95 ± 0.64	85 ± 0	6 ± 1.07	4.07 ± 0.7	13.8 ± 5.79	Brown	Rhomboid
TVu-2692	India	9.57 ± 0.05	10.01 ± 0	0.3 ± 0	2.4 ± 0.14	72 ± 0	5.93 ± 0.7	4.8 ± 0.68	9 ± 2.1	Brown	Ovoid
TVu-2693	India	6.83 ± 0.5	1.73 ± 0	0.33 ± 0	2.95 ± 0.64	124 ± 0	5.73 ± 0.59	4.27 ± 0.7	9.7 ± 2.31	Purple	Ovoid
TVu-2695	India	13.51 ± 0.1	2.44 ± 0	0.3 ± 0	2.65 ± 0.64	72 ± 0	6.07 ± 0.96	4.27 ± 0.7	10.2 ± 1.77	Purplish- brown	Rhomboid
TVu-2699	India	12.66 ± 0.1	3.16 ± 0	0.32 ± 0	3.75 ± 1.34	58.5 ± 4.95	6.33 ± 0.82	4.27 ± 0.59	8.7 ± 1.93	Purple	Ovoid
TVu-2701	India	12.55 ± 0.05	3.56 ± 0	0.43 ± 0	4.3 ± 0.14	61 ± 0	6.6 ± 0.74	4.47 ± 0.92	8.77 ± 1.46	Reddish-brown	Kidney
TVu-2706	India	21.32 ± 0.1	3.2 ± 0	0.39 ± 0	4.4 ± 0.28	69 ± 0	7.93 ± 1.49	4.73 ± 0.59	9.97 ± 1.26	Reddish-brown	Kidney
TVu-2714	India	15.96 ± 0.05	2.36 ± 0	0.4 ± 0	4.4 ± 0.28	75 ± 0	6.6 ± 0.91	4.53 ± 0.64	8.63 ± 0.85	Purple	Ovoid
TVu-2716	India	9.56 ± 0	4.18 ± 0	0.39 ± 0	4.3 ± 0.14	120 ± 0	6.2 ± 0.94	4.47 ± 0.74	9.83 ± 3.95	Mottled	Rhomboid
TVu-2720	India	8.5 ± 0.05	2.27 ± 0	0.27 ± 0	3.75 ± 1.34	49.5 ± 3.54	6 ± 0.93	4.33 ± 0.72	9.07 ± 0.85	White	Rhomboid
TVu-273	USA	8.08 ± 0.05	2.56 ± 0	0.4 ± 0	2.85 ± 0.64	57.5 ± 4.95	6.8 ± 1.21	4.67 ± 0.62	14.6 ± 5.87	Brown	Ovoid
TVu-2978	India	14.25 ± 0.05	1.6 ± 0	0.41 ± 0	2.65 ± 0.64	51 ± 0	5.6 ± 0.83	3.93 ± 0.59	9.9 ± 5.48	Brown	Rhomboid
TVu-3063	India	8.18 ± 0.1	2.77 ± 0	0.43 ± 0	3.4 ± 0.28	101 ± 0	6.87 ± 1.06	4.33 ± 0.9	7.3 ± 0.79	White	Ovoid
TVu-3064	India	12.02 ± 0.1	1.66 ± 0	0.44 ± 0	4.7 ± 0.28	122.5 ± 3.54	6.53 ± 0.74	3.87 ± 0.52	8.17 ± 1.31	White	Rhomboid
TVu-3067	India	4.77 ± 0.1	7.17 ± 0	0.28 ± 0.02	2.65 ± 0.64	56.5 ± 0.71	6.13 ± 1.13	4.33 ± 0.62	10.7 ± 1.18	White	Kidney
TVu-3090	India	14.89 ± 0.05	1.15 ± 0	0.37 ± 0	3.85 ± 1.34	69 ± 0	6.2 ± 0.86	4.47 ± 0.52	11.87 ± 5.45	Purple	Ovoid
TVu-3094	India	21.29 ± 0.15	1.29 ± 0	0.36 ± 0	3.85 ± 0.21	101.5 ± 0.71	5.93 ± 0.88	4.2 ± 0.41	10.23 ± 4.27	White	Kidney
TVu-3097	India	7.33 ± 0.2	5.84 ± 0	0.39 ± 0	3.85 ± 0.21	93 ± 2.83	6.67 ± 1.5	4.33 ± 0.72	9.1 ± 0.75	White	Kidney
TVu-310	USA	11.73 ± 0.5	2.78 ± 0	0.4 ± 0	2.95 ± 0.64	62 ± 2.83	6.33 ± 1.18	4.73 ± 0.59	10.17 ± 2.32	Mottled	Ovoid
TVu-3101	India	14.33 ± 0.15	2.01 ± 0	0.43 ± 0	2.65 ± 0.64	63 ± 2.83	8.8 ± 1.01	5.27 ± 0.88	17.33 ± 4.38	Reddish-brown	Kidney
TVu-3217	India	6.81 ± 0.07	3.74 ± 0	0.17 ± 0	3.2 ± 0.28	50.5 ± 2.12	6.13 ± 0.83	4.27 ± 0.59	6.13 ± 0.7	Brown	Rhomboid
TVu-322	USA	7.08 ± 0.05	1.11 ± 0	0.36 ± 0	3.35 ± 0.21	77 ± 2.83	3.73 ± 2.94	2.93 ± 2.22	14.75 ± 2.47	White	Ovoid
TVu-3224	India	9.44 ± 0.03	1.84 ± 0	0.56 ± 0	4.5 ± 0.28	55 ± 1.41	5.13 ± 0.64	4 ± 0.38	10.67 ± 4.5	Black	Ovoid
TVu-3228	India	7.94 ± 0.07	4.18 ± 0	0.16 ± 0	4.4 ± 0.28	58 ± 2.83	6.27 ± 1.1	4.73 ± 0.7	7 ± 0.4	Purplish- brown	Ovoid
TVu-3229	India	11.8 ± 0.1	2.42 ± 0	0.54 ± 0	4.3 ± 0.14	74.5 ± 6.36	5.2 ± 0.68	4.07 ± 0.46	7 ± 1.11	Purple	Ovoid
TVu-3231	India	10.81 ± 5.12	3.56 ± 0	0.33 ± 0	2.6 ± 0.14	87.5 ± 6.36	6.47 ± 1.06	4.53 ± 0.64	10.27 ± 3.17	Brown	Ovoid
TVu-3233	India	8.64 ± 0.15	3.95 ± 0	0.17 ± 0	2.55 ± 0.64	81.5 ± 4.95	5.6 ± 0.63	4.2 ± 0.68	10.63 ± 2.92	Mottled	Rhomboid
TVu-3235	India	17.1 ± 0.25	7.8 ± 0	0.25 ± 0	4.1 ± 0.14	72.5 ± 6.36	6.13 ± 0.92	4.47 ± 0.64	8.83 ± 0.92	Purple	Ovoid
TVu-3243	India	22.92 ± 0.25	8.39 ± 0	0.45 ± 0	2.85 ± 0.64	61.5 ± 6.36	6.6 ± 0.91	4.47 ± 0.64	9.03 ± 1.27	Brown	Ovoid
TVu-3247	India	4.91 ± 0	2.53 ± 0	0.31 ± 0	2.65 ± 0.64	77.5 ± 6.36	6.8 ± 1.01	4.73 ± 0.7	9.3 ± 1.22	Purple	Ovoid
TVu-3248	India	7.26 ± 0.2	2.85 ± 0	0.39 ± 0	5.1 ± 0	77 ± 1.41	7.33 ± 0.98	4.67 ± 0.62	10.83 ± 0.51	Purplish- brown	Ovoid
TVu-3249	India	16.53 ± 0.25	4.93 ± 0	0.35 ± 0	3.75 ± 1.34	67.5 ± 6.36	7 ± 1.13	4.73 ± 0.7	11.6 ± 2.33	Purplish- brown	Rhomboid
TVu-3250	India	19.33 ± 0.1	9.36 ± 0	0.32 ± 0	3.85 ± 0.21	74.5 ± 6.36	6.93 ± 1.33	4.6 ± 0.63	8.57 ± 0.38	Purple	Ovoid
TVu-3252	India	10.88 ± 0.3	3.64 ± 0	0.51 ± 0	5.5 ± 0	54.5 ± 6.36	6.07 ± 0.8	4.27 ± 0.46	8.93 ± 0.76	Brown	Ovoid
TVu-3253	India	13.54 ± 1.05	2.06 ± 0	0.69 ± 0	4.9 ± 0.28	56.5 ± 6.36	6.8 ± 0.86	4.4 ± 0.51	8.43 ± 0.06	Brown	Ovoid
TVu-3254	India	10.2 ± 0	4.56 ± 0	0.27 ± 0	4.9 ± 0.28	101.5 ± 6.36	7.33 ± 0.82	5 ± 0.93	13.63 ± 7.68	Brown	Ovoid
TVu-3257	India	13.44 ± 0.1	4.9 ± 0	0.39 ± 0	3.35 ± 0.21	52 ± 4.24	6.67 ± 0.9	5 ± 0.65	11.83 ± 3.03	Brown	Ovoid
TVu-3259	India	11.95 ± 0.2	3.96 ± 0	0.31 ± 0	4.1 ± 0.14	73.5 ± 6.36	6.73 ± 1.33	4.6 ± 0.51	9.43 ± 0.51	Brown	Ovoid
TVu-3261	India	6.12 ± 0.4	7.12 ± 0	0.46 ± 0	4.5 ± 0.28	67.5 ± 6.36	7.13 ± 1.25	4.6 ± 0.63	10.97 ± 3.35	Brown	Ovoid
TVu-3262	India	9.07 ± 0.07	1.68 ± 0	0.28 ± 0	3.1 ± 0.28	100.5 ± 6.36	7.53 ± 1.36	4.53 ± 0.83	8.07 ± 1.04	Reddish-brown	Ovoid
TVu-3263	India	3.6 ± 0.15	1.24 ± 0	0.28 ± 0	3.35 ± 0.21	60.5 ± 6.36	6.6 ± 0.83	4.6 ± 0.74	9.47 ± 0.93	Purple	Rhomboid
TVu-3267	India	5.2 ± 0	2.58 ± 0	0.24 ± 0	4.3 ± 0.14	55.5 ± 6.36	6.73 ± 0.96	4.47 ± 0.52	9.63 ± 2.15	Brown	Rhomboid
TVu-328	USA	13.33 ± 0.05	2.95 ± 0	0.53 ± 0	4.2 ± 0.14	45.5 ± 2.12	6.53 ± 0.83	4.8 ± 0.56	9.73 ± 1.94	Mottled	Ovoid
TVu-3502	India	19.37 ± 0.25	1.1 ± 0.02	0.24 ± 0	2.05 ± 0.07	80 ± 5.66	6.2 ± 1.01	4.4 ± 0.74	14.53 ± 1.85	Reddish-brown	Ovoid
TVu-3504	India	12.3 ± 0.2	4.69 ± 0	0.37 ± 0	3.3 ± 0.28	66 ± 2.83	6.27 ± 0.8	4.47 ± 0.52	11.8 ± 4.18	Purplish- brown	Ovoid
TVu-3506	India	10.85 ± 0.15	1.3 ± 0	0.25 ± 0	2.4 ± 0.14	64 ± 2.83	7.27 ± 1.28	4.67 ± 0.62	9.93 ± 2.89	Brown	Ovoid
TVu-3508	India	9.53 ± 0.1	4.75 ± 0	0.15 ± 0	4.9 ± 0.28	54.5 ± 0.71	7.07 ± 1.16	4.73 ± 0.88	10.03 ± 1.89	Brown	Ovoid
TVu-3509	India	7.65 ± 0.05	2.23 ± 0	0.32 ± 0	5.1 ± 0	70 ± 2.83	6.13 ± 0.64	4.33 ± 0.62	10.9 ± 2.23	Brown	Ovoid
TVu-3510	India	9.32 ± 0.2	2.33 ± 0	0.49 ± 0	4.6 ± 0.28	79 ± 2.83	5.67 ± 0.72	4 ± 0.38	9.23 ± 1.55	Brown	Rhomboid
TVu-3511	India	15.6 ± 0.15	2.99 ± 0	0.37 ± 0	1.75 ± 0.07	65 ± 2.83	6 ± 1.07	4.47 ± 0.52	8.33 ± 1.48	Brown	Rhomboid
TVu-3515	India	8.55 ± 0.1	3.65 ± 0	0.11 ± 0	1.65 ± 0.07	67 ± 0	6.33 ± 0.9	4.53 ± 0.52	12.07 ± 3.54	Purplish- brown	Rhomboid
TVu-3524	India	20.4 ± 0.1	1.19 ± 0	0.29 ± 0	3.6 ± 1.41	66 ± 2.83	5.67 ± 0.82	4.07 ± 0.59	13.07 ± 5.49	Brown	Rhomboid
TVu-3525	India	12.94 ± 0.1	7.36 ± 0	0.29 ± 0	2.75 ± 0.64	62.5 ± 4.95	6.47 ± 1.41	4.6 ± 0.51	12.6 ± 7.71	Purple	Rhomboid
TVu-3526	India	16.88 ± 0.35	3.34 ± 0	0.35 ± 0	4.4 ± 0.28	61 ± 2.83	5.4 ± 0.74	4.07 ± 0.7	7.87 ± 0.5	Purple	Ovoid
TVu-3532	India	19.08 ± 0.15	1.55 ± 0	0.27 ± 0	3.85 ± 0.21	89 ± 2.83	6.07 ± 0.7	4.07 ± 0.7	7.9 ± 1.15	Purple	Ovoid
TVu-3533	India	14.33 ± 0.15	21.44 ± 0	0.4 ± 0	4.4 ± 0.28	66 ± 0	7.2 ± 1.15	4.8 ± 0.68	12.5 ± 3.95	Brown	Ovoid
TVu-3534	India	17.84 ± 0.5	4.71 ± 0	0.29 ± 0	3.85 ± 1.34	83 ± 0	7 ± 0.76	5.07 ± 0.59	9.8 ± 0.53	Purplish- brown	Rhomboid
TVu-3535	India	8.79 ± 0.05	1.1 ± 0	0.32 ± 0	2.65 ± 0.64	52 ± 0	6.33 ± 0.62	4.27 ± 0.59	10.47 ± 0.35	Purplish- brown	Ovoid
TVu-3540	India	11.38 ± 0.1	12.52 ± 0	0.3 ± 0	3.1 ± 0.28	101 ± 0	6.07 ± 1.16	4.8 ± 0.68	8.33 ± 0.32	Black	Ovoid
TVu-3550	India	7.58 ± 0.35	2.57 ± 0	0.41 ± 0	5 ± 0	48.5 ± 0.71	8.8 ± 0.86	5.27 ± 0.59	11.1 ± 1.01	Reddish-brown	Kidney
TVu-361	USA	6.72 ± 0.07	1.5 ± 0	0.14 ± 0	3.85 ± 0.21	64 ± 2.83	6.6 ± 0.91	4.13 ± 0.64	8.43 ± 1.53	Reddish-brown	Ovoid
TVu-375	South Africa	6.23 ± 0.07	1.52 ± 0	0.12 ± 0	3.9 ± 0.14	79 ± 2.83	6.13 ± 0.83	4.6 ± 0.63	10.63 ± 1.14	Purplish- brown	Ovoid
TVu-387	USA	8.87 ± 0.07	0.88 ± 0	0.4 ± 0	3.5 ± 1.27	55.5 ± 2.12	6.33 ± 1.18	4.53 ± 0.52	9.8 ± 0.35	Brown	Ovoid
TVu-391	Nigeria	8.58 ± 0.97	1.69 ± 0	0.42 ± 0	2.95 ± 0.64	68.5 ± 3.54	6.87 ± 1.25	4.8 ± 0.77	13.13 ± 5.08	Purplish- brown	Ovoid
TVu-406	USA	4.56 ± 0.3	1.5 ± 0	0.28 ± 0	3.3 ± 0.28	63 ± 2.83	6.13 ± 0.83	4.6 ± 0.83	8.63 ± 0.68	Brown	Ovoid
TVu-416	USA	9.03 ± 0.2	4.25 ± 0	0.5 ± 0	2.2 ± 0	84 ± 2.83	7.07 ± 1.03	5 ± 0.85	11.47 ± 0.76	Brown	Ovoid
TVu-4568	Nigeria	12.19 ± 0.15	2.27 ± 0	0.33 ± 0	4.3 ± 0.14	61 ± 2.83	6.93 ± 0.88	4.87 ± 0.52	13.17 ± 4.1	White	Rhomboid
TVu-46	Nigeria	9.57 ± 0.05	1.25 ± 0	0.33 ± 0	4.4 ± 0.28	132 ± 1.41	7.53 ± 0.99	4.93 ± 0.8	10.63 ± 1.1	Brown	Ovoid
TVu-692	Hungary	14.4 ± 0.25	4.35 ± 0	0.33 ± 0	2.95 ± 0.64	98 ± 2.83	7.67 ± 0.9	5.53 ± 0.52	16.33 ± 4.74	White	Ovoid
TVu-81	South Africa	14.18 ± 0.05	0.94 ± 0	0.35 ± 0	5 ± 0	65 ± 2.83	5.4 ± 0.63	3.73 ± 0.46	7.23 ± 0.95	White	Rhomboid
TVu-972	Nigeria	10.77 ± 0.25	2.85 ± 0	0.52 ± 0	2.55 ± 0.07	64.5 ± 0.71	5.8 ± 0.94	3.87 ± 0.64	6.97 ± 0.32	Brown	Ovoid
TVu-990	South Africa	9.21 ± 0.15	16.49 ± 0	0.41 ± 0	3.3 ± 0.28	61.5 ± 0.71	6.33 ± 0.98	4.53 ± 0.52	11.23 ± 3.18	Purplish- brown	Ovoid
TVu-993	USA	15.07 ± 0.2	13.77 ± 0	0.3 ± 0	2.3 ± 0.14	57.5 ± 0.71	6.6 ± 0.51	4.73 ± 0.59	13.57 ± 2.87	White	Ovoid
TVx-3236	IITA	4 ± 0.03	2.67 ± 0	0.27 ± 0	3.65 ± 0.21	84.5 ± 0.71	6.6 ± 0.99	4.33 ± 0.62	8.27 ± 1.01	White	Rhomboid
TZcp34	Tanzania	14.64 ± 0.2	7.13 ± 0	0.32 ± 0	3.2 ± 0.28	72.5 ± 0.71	6.47 ± 1.36	4.47 ± 0.74	10.53 ± 1.78	Brown	Ovoid
TZcp43	Tanzania	6.13 ± 0.14	4.36 ± 0	0.27 ± 0	2.75 ± 0.64	79.5 ± 0.71	8.53 ± 1.68	5.47 ± 0.74	12.83 ± 0.93	Brown	Ovoid
TZcp5	Tanzania	17.84 ± 0.2	4.38 ± 0	0.5 ± 0	2.95 ± 0.64	77.5 ± 0.71	6.73 ± 1.03	4.93 ± 0.7	15.8 ± 6.14	Brown	Ovoid
TZcp50	Tanzania	15.25 ± 0.05	0.95 ± 0	0.28 ± 0	2.95 ± 0.64	58.5 ± 0.71	6 ± 1.2	4.13 ± 0.74	11.73 ± 4.86	Brown	Rhomboid
TZcp67	Tanzania	3.78 ± 0.2	1.94 ± 0	0.18 ± 0	3.5 ± 1.27	74.5 ± 0.71	7.6 ± 1.12	5 ± 0.65	14.77 ± 5.75	Brown	Ovoid
TZcp70	Tanzania	8.68 ± 0.07	2.82 ± 0	0.16 ± 0	4.5 ± 0.28	79.5 ± 0.71	6.4 ± 0.63	4.53 ± 0.52	11.5 ± 1.91	Brown	Ovoid
TZcp84	Tanzania	8.22 ± 0.15	2.72 ± 0	0.38 ± 0	#DIV/0!	#DIV/0!	6.47 ± 4.87	4.4 ± 3.36	18.8 ±	Reddish-brown	Ovoid
TZcp95	Tanzania	12.48 ± 0.55	3.38 ± 0	1.23 ± 0	4.7 ± 0.28	80.5 ± 0.71	6.93 ± 0.7	5 ± 0.65	9.97 ± 1.29	Brown	Ovoid
UAM09-1046-6-1	IITA	9.82 ± 0.1	1.15 ± 0	0.33 ± 0	2.65 ± 0.64	54 ± 0	8.13 ± 1.13	5.47 ± 0.83	16.77 ± 3.5	Brown	Rhomboid
UAM09-1051-1	IITA	12.23 ± 0.1	5.31 ± 0	0.39 ± 0	2.55 ± 0.07	58 ± 1.41	8.2 ± 1.32	5.07 ± 0.59	14.93 ± 0.21	Brown	Ovoid
UAM14-126-19-2	IITA	8.54 ± 0.1	3.06 ± 0	0.38 ± 0	4.7 ± 0.28	70.5 ± 0.71	8.6 ± 1.24	5.8 ± 0.68	21.7 ± 7.01	White	Rhomboid
V1-F3	Mozambique	11.88 ± 0.9	3.78 ± 0	0.15 ± 0	2.85 ± 0.64	73.5 ± 0.71	5.87 ± 0.99	4.33 ± 0.49	9.33 ± 0.38	Brown	Ovoid
V3-F0	Mozambique	8.82 ± 0.1	1.32 ± 0	0.39 ± 0	4.9 ± 0.28	65.5 ± 0.71	6.4 ± 0.63	4.73 ± 0.59	8.77 ± 1.91	Brown	Ovoid
Vuli-1	Tanzania	8.82 ± 0.07	1.76 ± 0	0.2 ± 0	4.3 ± 0.14	68.5 ± 0.71	6.6 ± 0.91	4.53 ± 0.83	14.53 ± 3.67	Red	Ovoid
Vuli-2	Tanzania	19.33 ± 0.2	1.44 ± 0	0.51 ± 0	4.8 ± 0.28	61.5 ± 0.71	5.73 ± 0.96	4.47 ± 0.52	9 ± 0.53	Brown	Ovoid
Vuli-AR 1	Tanzania	16.46 ± 0.15	2.89 ± 0	0.38 ± 0	2.85 ± 0.64	91.5 ± 0.71	7.07 ± 1.03	4.8 ± 0.77	11.4 ± 5.11	White	Kidney
Vuli-AR 2	Tanzania	8.54 ± 0.1	6.72 ± 0	0.33 ± 0	4.1 ± 0.14	77 ± 2.83	6.8 ± 1.26	4.73 ± 0.7	13.5 ± 3	White	Ovoid
				Summary statistics
Trait	M	SEM	SD	Min	Max	Range	Median	S2	Kurtosis	Skewness
Seed length (mm)	7.17	0.06	1.11	3.73	10.33	6.6	7	1.23	-0.19	0.42
Seed width (mm)	4.93	0.04	0.65	2.93	7.13	4.2	4.8	0.42	0.56	0.67
100 seed weight (g)	12.88	0.21	3.59	6	26.13	20.13	12.34	12.91	0.2	0.69
Cooking time (min)	81.49	1.45	25.28	39	191	152	77	639.23	3.07	1.5								***
Broth viscosity (cP)	3.62	0.04	0.76	1.6	5.5	3.9	3.65	0.58	-0.49	-0.04
Protein content (%)	11.05	0.24	4.14	3.6	22.92	19.32	10.85	17.21	-0.22	0.46
Iron content (mg/kg)	3.21	0.24	2.61	0.12	21.44	21.32	2.53	6.79	11.45	2.76
Zinc content (mg/kg)	0.36	0.01	0.22	0.08	2.63	2.55	0.34	0.05	42.1	5.35
				Analysis of Variance
	Seed length (mm)	Seed width (mm)	100 seed weight (g)	Cooking time (min)	Broth viscosity (cP)	Protein content (%)	Iron content (mg/kg)	Zinc content (mg/kg)
DF (Replication)	2	2	2
DF (Replication: Block)	99	99	99
DF (Genotype)	305	305	305	303	303	305	305	305
DF(Residual)	4183	4183	4183	304	304	306	306	306
Sum Sq (Replication)	249	9.49	1087
Sum Sq (Replication:Block)	463	211.5	543.5
Sum Sq (Genotype)	5659	1923.1	11685	386252	354	10497	4055	30.23
Sum Sq (Residual)	4929	2276.7	3511	3256	136	321	16	0.01
Mean Sq (Replication)	124.68	9.49	543.5
Mean Sq (Replication:Block)	4.67	2.14	10.9
Mean Sq (Genotype)	18.55	6.31	38.3	1274.8	1.17	34.42	13.58	0.1
Mean Sq (Residual)	1.18	0.54	7	10.7	0.42	1.05	0.05	0
F Value (Replication)	105.81	17.44	78.16
F Value (Replication:Block)	3.97	3.93	1.57
F Value (Genotype)	15.75	11.58	5.51	119	2.61	32.76	253.1	4233
Pr(>F) Genotype	<2e-16 ***	<2e-16 ***	<2e-16 ***	<2e-16 ***	<2e-16 ***	<2e-16 ***	<2e-16 ***	<2e-16 ***
Pr(>F) Replication	<2e-16 ***	2.87e-08 ***	<2e-16 ***
Pr(>F) Replication:Block	<2e-16 ***	<2e-16 ***	0.00**
Grand mean	7.17	4.93	12.86	81.52	3.62	11.05	3.21	0.36
CV (%)	15.14	14.97	20.51	4.01	18.48	9.27	7.1	1.23
